# Supplementary material for: A photosensitive metal–organic framework having a flower-like structure for effective visible light-driven photodegradation of rhodamine B
Source: PubMed Central journal article supplement — RSC Adv. 2021 May 24;11(30):18565–75. doi: 10.1039/d1ra02746h (PMC9033431; doi:10.1039/d1ra02746h), 2021-05-24
Supplement: RA-011-D1RA02746H-s001.pdf [file RA-011-D1RA02746H-s001.pdf]

## Electronic Supplementary Material

### Photosensitive metal–organic framework having a flower-like structure for effective visible light–driven photodegradation of rhodamine B

*Lu Qin, Shicheng Zhao\* (✉), Chenran Fan, Qian Ye*

Shanghai Key Laboratory of Multiphase Materials Chemical Engineering, School of Chemical Engineering, East China University of Science and Technology, 130 Meilong Road, Shanghai 200237, China

#### **This file includes**

**Figure S1.** UV–vis spectra of TCPP and flower-like M-TCPP (M=Cu、Zn、Co).

**Figure S2.** EDS point scan of flower-like Cu-TCPP.

**Figure S3.** Thermogravimetric curve of flower-like Cu-TCPP.

**Figure S4.** XRD spectra (a) and infrared spectra (b) of flower-like Cu-TCPP before and after the photocatalytic experiments.

**Figure S5.** SEM images of flower-like Cu-TCPP before and after the photocatalytic reaction.

**Figure S6.** Structure and standard curve of Rhodamine B.

**Figure S7.** UV–vis DRS spectra of flower-like Cu-TCPP; (b) Tauc plot of the UV-vis DRS spectrum of flower-like Cu-TCPP.

**Figure S8.** VB XPS diagram of flower-like Cu-TCPP.

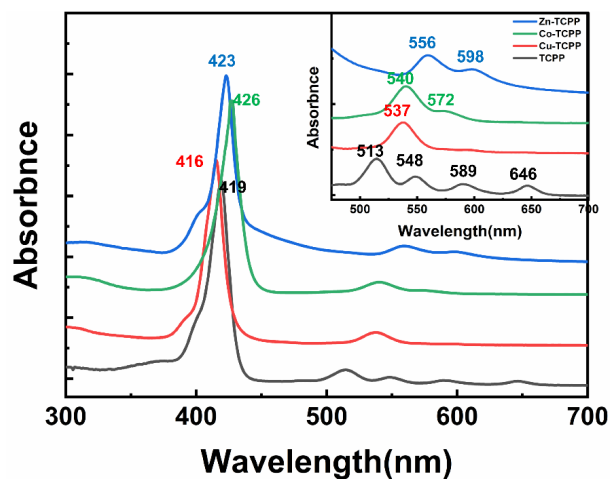

**Figure S1.** UV-vis spectra of TCPP and flower-like M-TCPP (M=Cu, Zn, Co).

(Added 10  $\mu$ L of TFA) .

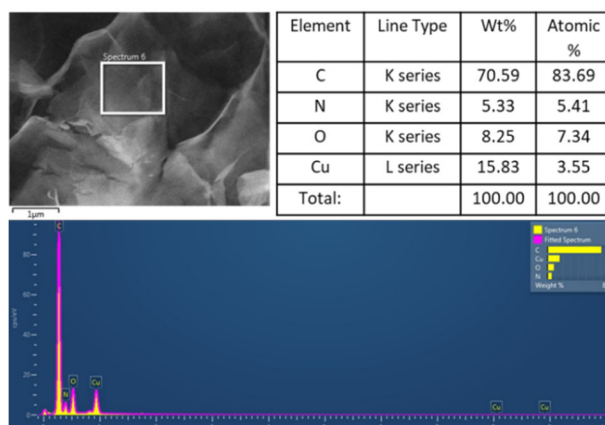

**Figure S2.** EDS point scan of flower-like Cu-TCPP.

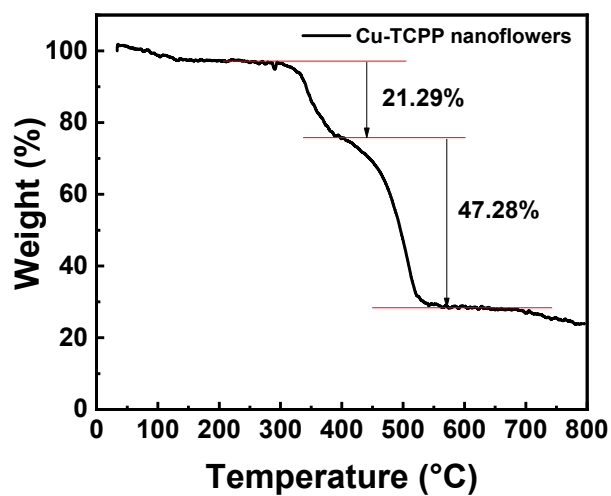

**Figure S3.** Thermogravimetric curve of flower-like Cu-TCPP.

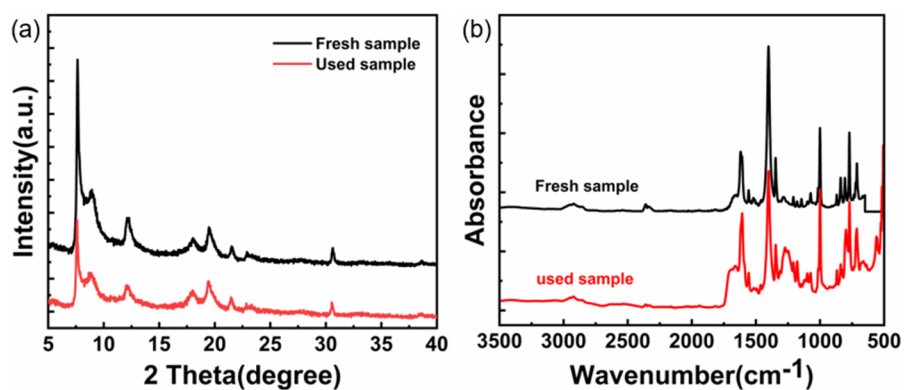

**Figure S4.** XRD spectra (a) and infrared spectra (b) of Cu-TCPP nanoflowers before and after the photocatalytic experiments. Experimental conditions: RhB, 10 mg L<sup>-1</sup>; flower-like Cu-TCPP, 0.1 g L<sup>-1</sup>; initial pH 11.

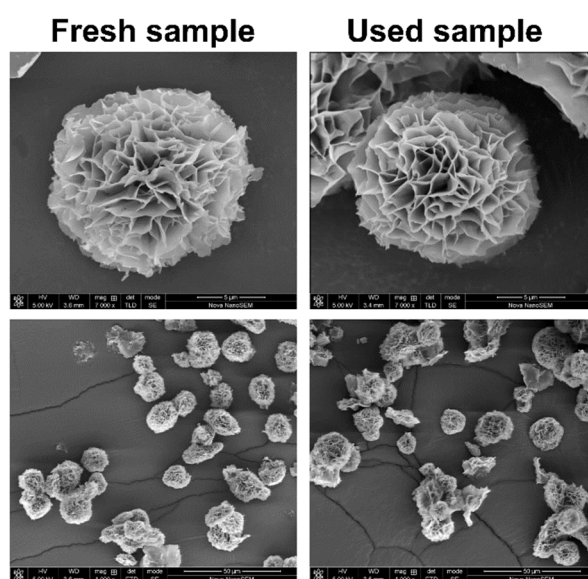

**Figure S5.** SEM images of flower-like Cu-TCPP before and after the photocatalytic reaction. Experimental conditions: RhB, 10 mg L<sup>-1</sup>; flower-like Cu-TCPP, 0.1 g L<sup>-1</sup>; initial pH 11.

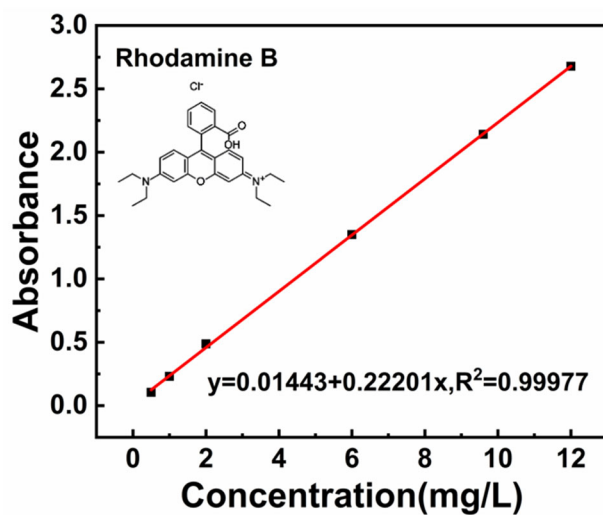

**Figure S6.** Structure and standard curve of Rhodamine B.

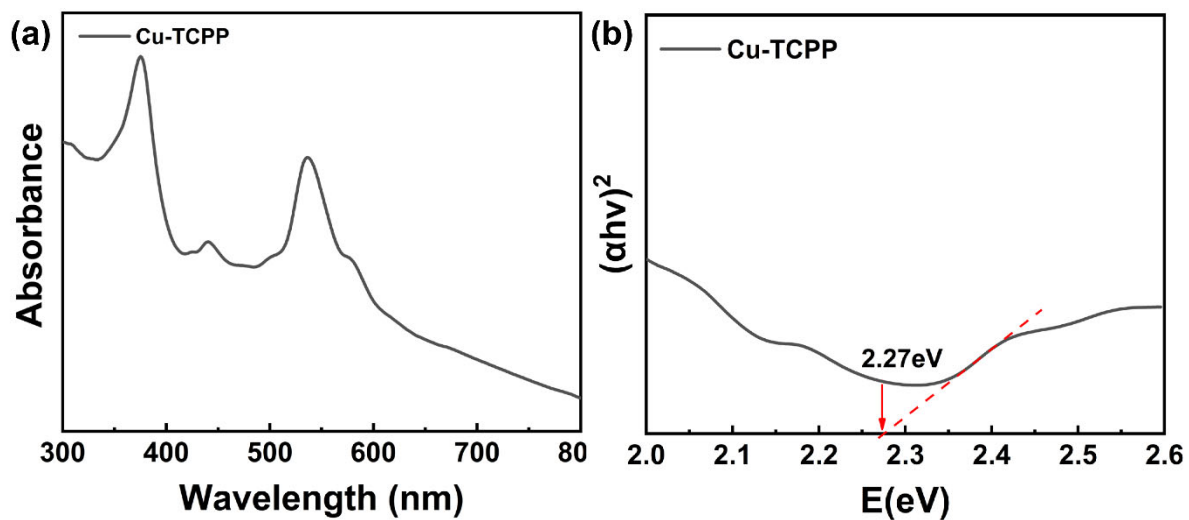

**Figure S7.** (a) UV-vis DRS spectra of flower-like Cu-TCPP; (b) Tauc plot of the UV-vis DRS spectrum of flower-like Cu-TCPP.

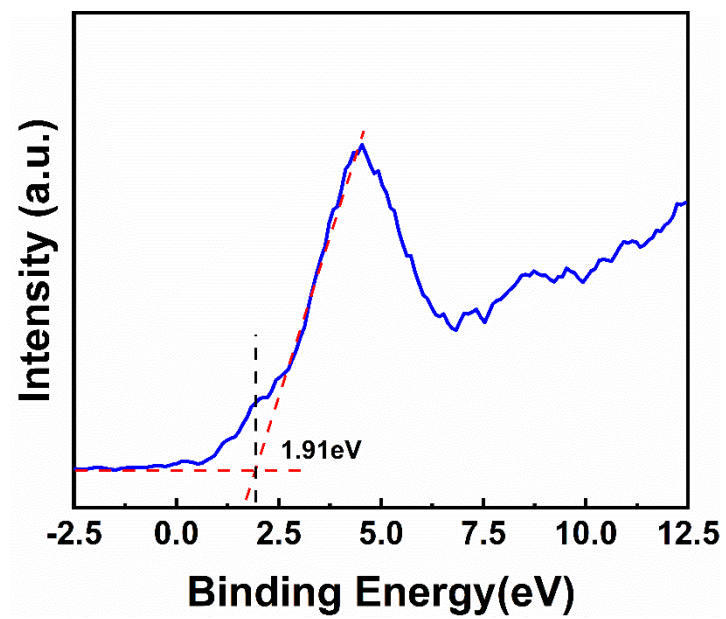

**Figure S8.** VB XPS diagram of flower-like Cu-TCPP.
